# Supplementary material
Source: PubMed Central journal article supplement (PMC8184226)
Supplement: euab013_supplementary_appendix.pdf [file euab013_supplementary_appendix.pdf]

## ONLINE APPENDIX

**Table S1. Univariate Analyses of Baseline Variables.**

| Variable                       | Primary Endpoint |           |       | Total Mortality |           |        |
|--------------------------------|------------------|-----------|-------|-----------------|-----------|--------|
|                                | sHR              | 95% C.I.  | p     | HR              | 95% C.I.  | p      |
| Age, yrs                       | 1.01             | 0.98-1.04 | 0.537 | 1.05            | 1.03-1.06 | <0.001 |
| Sex, (male)                    | 2.11             | 0.73-6.09 | 0.166 | 1.47            | 1.02-2.11 | 0.036  |
| <b>Previous cardiac events</b> |                  |           |       |                 |           |        |
| Myocardial infarction          | 6.04             | 1.82-20.0 | 0.003 | 1.01            | 0.75-1.36 | 0.942  |
| PCI                            | 1.42             | 0.66-3.03 | 0.369 | 0.77            | 0.55-1.07 | 0.115  |
| Coronary artery bypass         | 2.04             | 0.92-4.52 | 0.079 | 1.22            | 0.86-1.74 | 0.260  |
| <b>Co-morbidities</b>          |                  |           |       |                 |           |        |
| Diabetes mellitus              | 1.42             | 0.58-3.47 | 0.439 | 1.35            | 0.94-1.94 | 0.109  |
| Hypertension                   | 1.18             | 0.52-2.66 | 0.694 | 1.12            | 0.81-1.56 | 0.494  |

Results from competing risks analyses are shown as subdistribution hazard ratios (sHR) and 95% confidence intervals (CI).

**Abbreviations:** PCI = percutaneous coronary intervention.
